# Supplementary material for: Morphology controlled synthesis of Fe3+-doped upconversion nanomaterials
Source: Royal Society of Chemistry journal article supplement (doi:10.1039/d3ra07908b), 2024-01-01
Supplement: d3ra07908b1.pdf [file d3ra07908b1.pdf]

Supplementary Information

### Morphology controlled synthesis of Fe<sup>3+</sup>-doped upconversion nanomaterials

Fuhua Huang<sup>1,2,3,4</sup>, Cong Liu<sup>2,3,4</sup>, Zhuoya Zhao<sup>2,3,4</sup>, Li Wang<sup>2,3,4</sup>, Jinglai Zhang<sup>2,3,4</sup>, Hans Ågren<sup>2,3,4</sup>, Jerker Widengren<sup>5</sup>, Haichun Liu<sup>\*5</sup>

<sup>1</sup> Hunan Provincial Key Laboratory of Environmental Catalysis & Waste Recycling, College of Materials and Chemical Engineering, Hunan Institute of Engineering, Xiangtan 411104, P. R. China

<sup>2</sup> Henan Center for Outstanding Overseas Scientists, Henan University, KaiFeng 475004, P. R. China

<sup>3</sup> College of Chemistry and Molecular Sciences, Henan University, KaiFeng, Henan 475004, P. R. China

<sup>4</sup> Henan Key Laboratory of Protection and Safety Energy Storage of Light Metal Materials, Henan University, KaiFeng, Henan 475004, P. R. China

<sup>5</sup> Department of Applied Physics, KTH Royal Institute of Technology, S-10691, Stockholm, Sweden

### Supplementary Figures

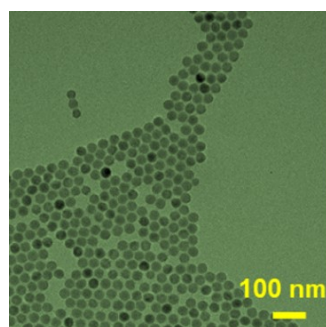

Fig. S1 TEM image of NaYF<sub>4</sub>: 20%Yb, 2%Er nanoparticles, synthesized with OA/ODE=0.4/1.

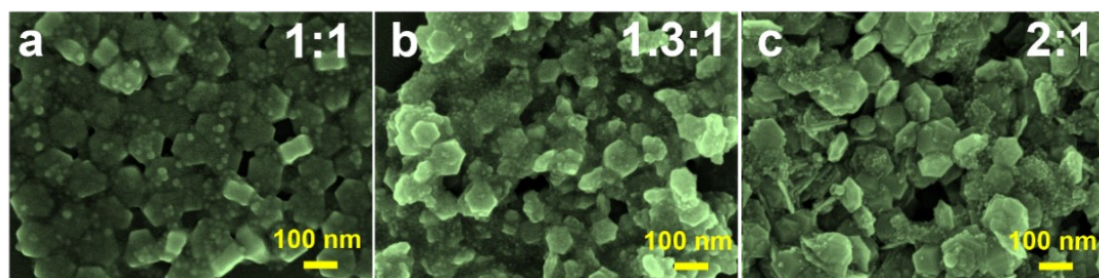

Fig. S2 SEM images of NaYF<sub>4</sub>: 20% Yb, 2% Er, 20% Fe nanoparticles, synthesized with (a) OA/ODE=1/1, (b) OA/ODE=1.3/1, and (c) OA/ODE=2/1.

---

\*Corresponding author.

E-mail addresses: [haichun@kth.se](mailto:haichun@kth.se) (H. Liu)

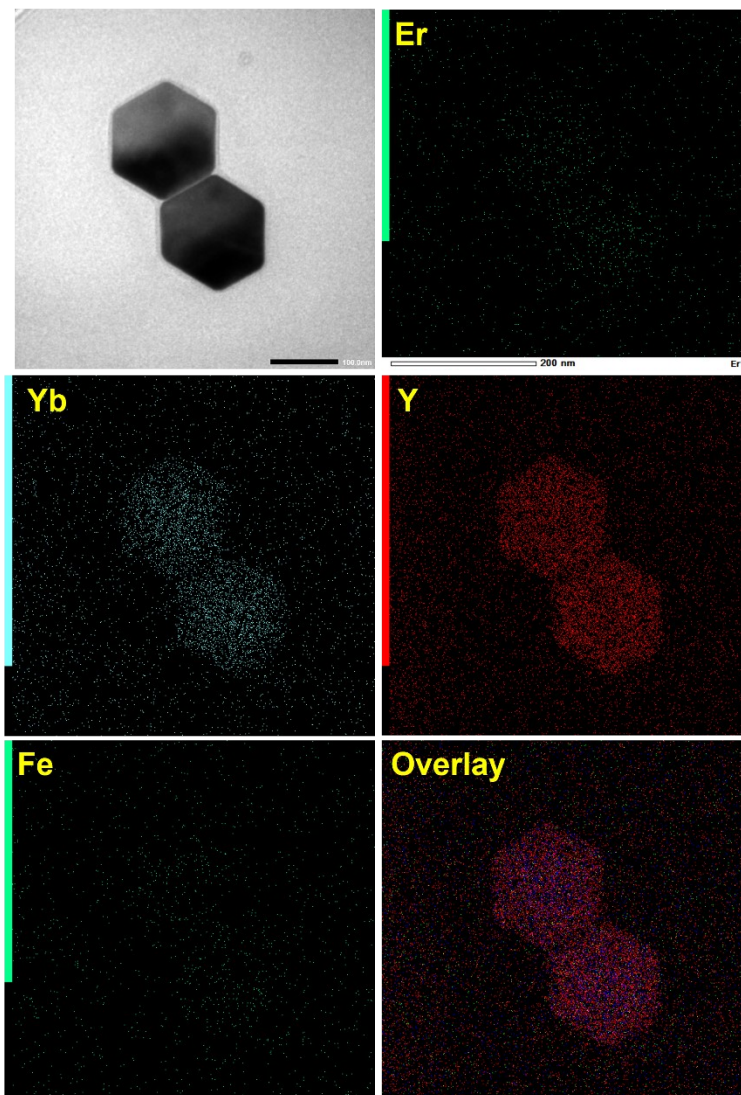

Fig. S3 Elemental analysis chart of NaYF<sub>4</sub>: 20% Yb, 2% Er, 20% Fe nanocrystals.

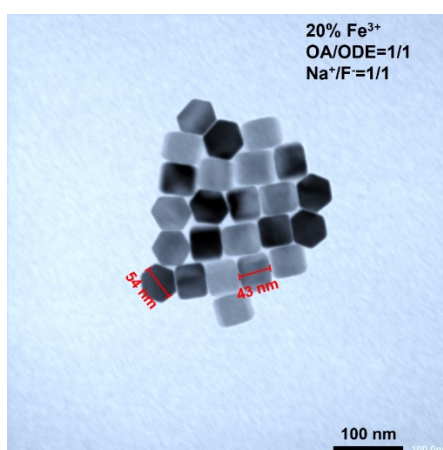

Fig. S4 TEM image of NaYF<sub>4</sub>: 20% Yb, 2% Er, 20% Fe nanoparticles, synthesized with OA/ODE=1/1 and Na<sup>+</sup>/F<sup>-</sup>=0.625/1.

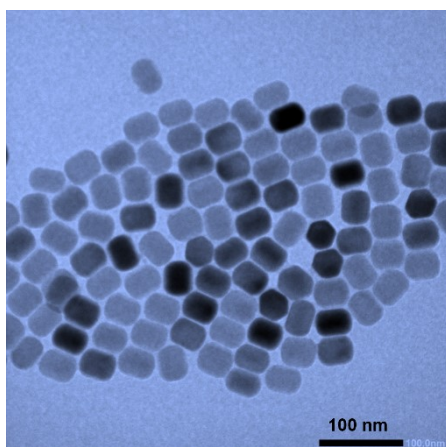

Fig. S5 TEM image of NaYF<sub>4</sub>: 20% Yb, 2% Er, 20% Fe nanoparticles, synthesized with OA/ODE=1.3/1 and Na<sup>+</sup>/F<sup>-</sup>=1.5/1.
